# Supplementary material for: Achieving a tobacco-free Bangladesh by 2040: a qualitative analysis of the tobacco advertising environment and prohibitions in Bangladesh
Source: PubMed Central journal article supplement — BMJ Open. 2023 May 23;13(5):e069620. doi: 10.1136/bmjopen-2022-069620 (PMC10231021; doi:10.1136/bmjopen-2022-069620), 2023-05-23
Supplement: bmjopen-2022-069620supp001.pdf [file bmjopen-2022-069620supp001.pdf]

## Supplementary File 1: Table of sources from where data was extracted

| Name                                                                                    | URL                                                                                                                                                                                                                                                                                                                                                                                                                                                                            |
|-----------------------------------------------------------------------------------------|--------------------------------------------------------------------------------------------------------------------------------------------------------------------------------------------------------------------------------------------------------------------------------------------------------------------------------------------------------------------------------------------------------------------------------------------------------------------------------|
| <b>Academic literature search engines</b>                                               |                                                                                                                                                                                                                                                                                                                                                                                                                                                                                |
| PubMed                                                                                  | <a href="https://pubmed.ncbi.nlm.nih.gov">https://pubmed.ncbi.nlm.nih.gov</a>                                                                                                                                                                                                                                                                                                                                                                                                  |
| Embase                                                                                  | <a href="https://www.embase.com">https://www.embase.com</a>                                                                                                                                                                                                                                                                                                                                                                                                                    |
| Scopus                                                                                  | <a href="https://www.scopus.com">https://www.scopus.com</a>                                                                                                                                                                                                                                                                                                                                                                                                                    |
| Science Direct                                                                          | <a href="https://www.sciencedirect.com">https://www.sciencedirect.com</a>                                                                                                                                                                                                                                                                                                                                                                                                      |
| Web of Science                                                                          | <a href="https://webofknowledge.com">https://webofknowledge.com</a>                                                                                                                                                                                                                                                                                                                                                                                                            |
| <b>News media databases</b>                                                             |                                                                                                                                                                                                                                                                                                                                                                                                                                                                                |
| Nexis                                                                                   | <a href="https://nexis.com">https://nexis.com</a>                                                                                                                                                                                                                                                                                                                                                                                                                              |
| ProQuest                                                                                | <a href="https://www.proquest.com">https://www.proquest.com</a>                                                                                                                                                                                                                                                                                                                                                                                                                |
| <b>Tobacco control policy documents</b>                                                 |                                                                                                                                                                                                                                                                                                                                                                                                                                                                                |
| CTFK-Tobacco Control Laws                                                               | <a href="https://www.tobaccocontrollaws.org">https://www.tobaccocontrollaws.org</a>                                                                                                                                                                                                                                                                                                                                                                                            |
| <b>Tobacco Industry websites</b>                                                        |                                                                                                                                                                                                                                                                                                                                                                                                                                                                                |
| British American Tobacco - Bangladesh                                                   | <a href="https://www.batbangladesh.com/">https://www.batbangladesh.com/</a>                                                                                                                                                                                                                                                                                                                                                                                                    |
| <b>Governmental sources</b>                                                             |                                                                                                                                                                                                                                                                                                                                                                                                                                                                                |
| National Tobacco Control Cell                                                           | <a href="https://ntcc.gov.bd/">https://ntcc.gov.bd/</a>                                                                                                                                                                                                                                                                                                                                                                                                                        |
| <b>National or transnational organizations or coalitions focused on tobacco control</b> |                                                                                                                                                                                                                                                                                                                                                                                                                                                                                |
| World Health Organization (WHO)                                                         | <p>Global site:<br/> <a href="https://www.who.int">https://www.who.int</a><br/>           Regional site:<br/> <a href="https://www.who.int/southeastasia">https://www.who.int/southeastasia</a><br/>           Country Office site:<br/> <a href="https://www.who.int/bangladesh/">https://www.who.int/bangladesh/</a><br/>           Institutional Repository for Information Sharing (IRIS) site:<br/> <a href="https://apps.who.int/iris">https://apps.who.int/iris</a></p> |
| WHO Framework Convention Secretariat (WHO FCTC)                                         | <a href="https://untobaccocontrol.org/impldb/sudan/">https://untobaccocontrol.org/impldb/sudan/</a>                                                                                                                                                                                                                                                                                                                                                                            |
| Framework Convention Alliance (FCA)                                                     | <a href="https://fctc.org/">https://fctc.org/</a>                                                                                                                                                                                                                                                                                                                                                                                                                              |
| Association for Community Development (ACD)                                             | <a href="https://acdbd.org/">https://acdbd.org/</a>                                                                                                                                                                                                                                                                                                                                                                                                                            |
| AID Foundation                                                                          | <a href="https://aid-bd.org/">https://aid-bd.org/</a>                                                                                                                                                                                                                                                                                                                                                                                                                          |
| Foundation through Research and Knowledge (ARK) Foundation                              | <a href="https://arkfoundationbd.org/">https://arkfoundationbd.org/</a>                                                                                                                                                                                                                                                                                                                                                                                                        |
| Dhaka Ahsania Mission (DAM)                                                             | <a href="http://www.ahsaniamission.org.bd/">http://www.ahsaniamission.org.bd/</a>                                                                                                                                                                                                                                                                                                                                                                                              |
| National Anti-Tuberculosis Association of Bangladesh (NATAB)                            | <a href="http://www.natabbd.org/">http://www.natabbd.org/</a>                                                                                                                                                                                                                                                                                                                                                                                                                  |
| Knowledge for Progress (PROGGA)                                                         | <a href="http://progga.org/">http://progga.org/</a>                                                                                                                                                                                                                                                                                                                                                                                                                            |
| Work for a Better Bangladesh Trust (WBB Trust)                                          | <a href="http://www.wbbtrust.org/">http://www.wbbtrust.org/</a>                                                                                                                                                                                                                                                                                                                                                                                                                |
| Bloomberg Initiative – Tobacco Control Grants Program                                   | <a href="https://tobaccocontrolgrants.org/">https://tobaccocontrolgrants.org/</a>                                                                                                                                                                                                                                                                                                                                                                                              |
| Campaign for Tobacco Free Kids (CTFK)                                                   | <a href="https://www.tobaccofreekids.org">https://www.tobaccofreekids.org</a>                                                                                                                                                                                                                                                                                                                                                                                                  |
| Global Center for Good Governance in Tobacco Control (GGTC)                             | <a href="https://ggtc.world">https://ggtc.world</a>                                                                                                                                                                                                                                                                                                                                                                                                                            |
| Southeast Asia Tobacco Control Alliance (SEATCA)                                        | <a href="https://seatca.org/">https://seatca.org/</a>                                                                                                                                                                                                                                                                                                                                                                                                                          |

|                                                                                 |                                                                                                                                                                                               |
|---------------------------------------------------------------------------------|-----------------------------------------------------------------------------------------------------------------------------------------------------------------------------------------------|
| <b>Stopping Tobacco Organizations and Products (STOP) &amp; Tobacco Tactics</b> | <i>STOP site:</i><br><a href="https://exposetobacco.org">https://exposetobacco.org</a><br><i>Tobacco Tactics site:</i><br><a href="https://tobaccotactics.org">https://tobaccotactics.org</a> |
| <b>International Union Against Tuberculosis and Lung Disease (The Union)</b>    | <a href="https://theunion.org">https://theunion.org</a>                                                                                                                                       |
